# Supplementary material for: Artificial radionuclides in neon flying squid from the northwestern Pacific in 2011 following the Fukushima accident
Source: Copernicus journal article supplement (doi:10.5194/bg-15-7235-2018), 2018-12-05
Supplement: Supplementary file 1 [file bg-15-7235-2018-supplement.zip]

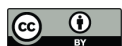

## *Supplement of*

# **Artificial radionuclides in neon flying squid from the northwestern Pacific in 2011 following the Fukushima accident**

**Wen Yu et al.**

*Correspondence to:* Wen Yu ([yuwen@tio.org.cn](mailto:yuwen@tio.org.cn))

- [bg-15-7235-2018-supplement-title-page.pdf](#)
- [Dataset.xlsx](#)
- [Supplement.pdf](#)

The copyright of individual parts of the supplement might differ from the CC BY 4.0 License.
