# Supplementary material for: Artificial radionuclides in neon flying squid from the northwestern Pacific in 2011 following the Fukushima accident
Source: Copernicus journal article supplement (doi:10.5194/bg-15-7235-2018), 2018-12-05
Supplement: Supplementary file 1 [file Dataset.xlsx]

## Sheet: data
Sample type	Latitude degrees	Latitude minutes	Latitude seconds	Latitude direction	Longitude degrees	Longitude minutes	Longitude seconds	Longitude direction	Latitude decimal	Longitude decimal	Sampling start date	Sampling start time	Sampling end date	Nuclide	Value type	Unit	Activity or MDA	Uncertainty	Species	Body part	Wet weight	Station ID	Sampling method	Preparation method	Drying method	Counting method	Sample notes	Measurement notes
BIOTA	38	30	0	N	149	0	0	E	38.5	149	2011-12-10	14:45:00	2011-12-10	137Cs	=	Bq/kg ww	0.24	0.02	Ommastrephes bartramii	FLESH WITHOUT BONES	7640	XTJ5-2	NOT LISTED	DRY ASHING ONLY	OVEN DRYING	GAMMA SEMICONDUCTOR SPETROMETRY
BIOTA	38	30	0	N	149	0	0	E	38.5	149	2011-12-10	14:45:00	2011-12-10	134Cs	=	Bq/kg ww	0.21	0.01	Ommastrephes bartramii	FLESH WITHOUT BONES	7640	XTJ5-2	NOT LISTED	DRY ASHING ONLY	OVEN DRYING	GAMMA SEMICONDUCTOR SPETROMETRY
BIOTA	38	30	0	N	149	0	0	E	38.5	149	2011-12-10	14:45:00	2011-12-10	110m Ag	=	Bq/kg ww	0.28	0.01	Ommastrephes bartramii	FLESH WITHOUT BONES	7640	XTJ5-2	NOT LISTED	DRY ASHING ONLY	OVEN DRYING	GAMMA SEMICONDUCTOR SPETROMETRY
BIOTA	38	30	0	N	149	0	0	E	38.5	149	2011-12-10	14:45:00	2011-12-10	238U	=	Bq/kg ww	0.82	0.07	Ommastrephes bartramii	FLESH WITHOUT BONES	7640	XTJ5-2	NOT LISTED	DRY ASHING ONLY	OVEN DRYING	GAMMA SEMICONDUCTOR SPETROMETRY
BIOTA	38	30	0	N	149	0	0	E	38.5	149	2011-12-10	14:45:00	2011-12-10	40K	=	Bq/kg ww	71.75	4.78	Ommastrephes bartramii	FLESH WITHOUT BONES	7640	XTJ5-2	NOT LISTED	DRY ASHING ONLY	OVEN DRYING	GAMMA SEMICONDUCTOR SPETROMETRY
BIOTA	38	30	0	N	149	0	0	E	38.5	149	2011-12-10	14:45:00	2011-12-10	226Ra	=	Bq/kg ww	0.03	0	Ommastrephes bartramii	FLESH WITHOUT BONES	7640	XTJ5-2	NOT LISTED	DRY ASHING ONLY	OVEN DRYING	GAMMA SEMICONDUCTOR SPETROMETRY
BIOTA	38	30	0	N	149	0	0	E	38.5	149	2011-12-10	14:45:00	2011-12-10	137Cs	=	Bq/kg ww	0	0	Ommastrephes bartramii	NOT LISTED	1680	XTJ5-2	NOT LISTED	DRY ASHING ONLY	OVEN DRYING	GAMMA SEMICONDUCTOR SPETROMETRY	Body part: soft tissues (including the digestive tract, gills, heart, gonads and associated glands)Sampling method: Angle; Multiple specimens from the same sampling site were analyzed as composite samples
BIOTA	38	30	0	N	149	0	0	E	38.5	149	2011-12-10	14:45:00	2011-12-10	134Cs	=	Bq/kg ww	0	0	Ommastrephes bartramii	NOT LISTED	1680	XTJ5-2	NOT LISTED	DRY ASHING ONLY	OVEN DRYING	GAMMA SEMICONDUCTOR SPETROMETRY	Body part: soft tissues (including the digestive tract, gills, heart, gonads and associated glands)Sampling method: Angle; Multiple specimens from the same sampling site were analyzed as composite samples
BIOTA	38	30	0	N	149	0	0	E	38.5	149	2011-12-10	14:45:00	2011-12-10	110m Ag	=	Bq/kg ww	35.45	1.18	Ommastrephes bartramii	NOT LISTED	1680	XTJ5-2	NOT LISTED	DRY ASHING ONLY	OVEN DRYING	GAMMA SEMICONDUCTOR SPETROMETRY	Body part: soft tissues (including the digestive tract, gills, heart, gonads and associated glands)Sampling method: Angle; Multiple specimens from the same sampling site were analyzed as composite samples
BIOTA	38	30	0	N	149	0	0	E	38.5	149	2011-12-10	14:45:00	2011-12-10	238U	=	Bq/kg ww	7.89	0.75	Ommastrephes bartramii	NOT LISTED	1680	XTJ5-2	NOT LISTED	DRY ASHING ONLY	OVEN DRYING	GAMMA SEMICONDUCTOR SPETROMETRY	Body part: soft tissues (including the digestive tract, gills, heart, gonads and associated glands)Sampling method: Angle; Multiple specimens from the same sampling site were analyzed as composite samples
BIOTA	38	30	0	N	149	0	0	E	38.5	149	2011-12-10	14:45:00	2011-12-10	40K	=	Bq/kg ww	50.51	3.58	Ommastrephes bartramii	NOT LISTED	1680	XTJ5-2	NOT LISTED	DRY ASHING ONLY	OVEN DRYING	GAMMA SEMICONDUCTOR SPETROMETRY	Body part: soft tissues (including the digestive tract, gills, heart, gonads and associated glands)Sampling method: Angle; Multiple specimens from the same sampling site were analyzed as composite samples
BIOTA	38	30	0	N	149	0	0	E	38.5	149	2011-12-10	14:45:00	2011-12-10	226Ra	=	Bq/kg ww	0.68	0.06	Ommastrephes bartramii	NOT LISTED	1680	XTJ5-2	NOT LISTED	DRY ASHING ONLY	OVEN DRYING	GAMMA SEMICONDUCTOR SPETROMETRY	Body part: soft tissues (including the digestive tract, gills, heart, gonads and associated glands)Sampling method: Angle; Multiple specimens from the same sampling site were analyzed as composite samples
BIOTA	38	30	0	N	149	0	0	E	38.5	149	2011-12-10	14:45:00	2011-12-10	137Cs	=	Bq/kg ww	0.28	0.02	Ommastrephes bartramii	FLESH WITHOUT BONES	11050	XTJ5-2	NOT LISTED	DRY ASHING ONLY	OVEN DRYING	GAMMA SEMICONDUCTOR SPETROMETRY	Sampling method: Angle; Multiple specimens from the same sampling site were analyzed as composite samples
BIOTA	38	30	0	N	149	0	0	E	38.5	149	2011-12-10	14:45:00	2011-12-10	134Cs	=	Bq/kg ww	0.24	0.01	Ommastrephes bartramii	FLESH WITHOUT BONES	11050	XTJ5-2	NOT LISTED	DRY ASHING ONLY	OVEN DRYING	GAMMA SEMICONDUCTOR SPETROMETRY	Sampling method: Angle; Multiple specimens from the same sampling site were analyzed as composite samples
BIOTA	38	30	0	N	149	0	0	E	38.5	149	2011-12-10	14:45:00	2011-12-10	110m Ag	=	Bq/kg ww	0.14	0	Ommastrephes bartramii	FLESH WITHOUT BONES	11050	XTJ5-2	NOT LISTED	DRY ASHING ONLY	OVEN DRYING	GAMMA SEMICONDUCTOR SPETROMETRY	Sampling method: Angle; Multiple specimens from the same sampling site were analyzed as composite samples
BIOTA	38	30	0	N	149	0	0	E	38.5	149	2011-12-10	14:45:00	2011-12-10	238U	=	Bq/kg ww	0.86	0.07	Ommastrephes bartramii	FLESH WITHOUT BONES	11050	XTJ5-2	NOT LISTED	DRY ASHING ONLY	OVEN DRYING	GAMMA SEMICONDUCTOR SPETROMETRY	Sampling method: Angle; Multiple specimens from the same sampling site were analyzed as composite samples
BIOTA	38	30	0	N	149	0	0	E	38.5	149	2011-12-10	14:45:00	2011-12-10	40K	=	Bq/kg ww	76.51	5.09	Ommastrephes bartramii	FLESH WITHOUT BONES	11050	XTJ5-2	NOT LISTED	DRY ASHING ONLY	OVEN DRYING	GAMMA SEMICONDUCTOR SPETROMETRY	Sampling method: Angle; Multiple specimens from the same sampling site were analyzed as composite samples
BIOTA	38	30	0	N	149	0	0	E	38.5	149	2011-12-10	14:45:00	2011-12-10	226Ra	=	Bq/kg ww	0.03	0	Ommastrephes bartramii	FLESH WITHOUT BONES	11050	XTJ5-2	NOT LISTED	DRY ASHING ONLY	OVEN DRYING	GAMMA SEMICONDUCTOR SPETROMETRY	Sampling method: Angle; Multiple specimens from the same sampling site were analyzed as composite samples
BIOTA	38	30	0	N	149	0	0	E	38.5	149	2011-12-10	14:45:00	2011-12-10	137Cs	=	Bq/kg ww	0.13	0.01	Ommastrephes bartramii	NOT LISTED	2200	XTJ5-2	NOT LISTED	DRY ASHING ONLY	OVEN DRYING	GAMMA SEMICONDUCTOR SPETROMETRY	Body part: soft tissues (including the digestive tract, gills, heart, gonads and associated glands)Sampling method: Angle; Multiple specimens from the same sampling site were analyzed as composite samples
BIOTA	38	30	0	N	149	0	0	E	38.5	149	2011-12-10	14:45:00	2011-12-10	134Cs	=	Bq/kg ww	0.21	0.02	Ommastrephes bartramii	NOT LISTED	2200	XTJ5-2	NOT LISTED	DRY ASHING ONLY	OVEN DRYING	GAMMA SEMICONDUCTOR SPETROMETRY	Body part: soft tissues (including the digestive tract, gills, heart, gonads and associated glands)Sampling method: Angle; Multiple specimens from the same sampling site were analyzed as composite samples
BIOTA	38	30	0	N	149	0	0	E	38.5	149	2011-12-10	14:45:00	2011-12-10	110m Ag	=	Bq/kg ww	36.21	1.19	Ommastrephes bartramii	NOT LISTED	2200	XTJ5-2	NOT LISTED	DRY ASHING ONLY	OVEN DRYING	GAMMA SEMICONDUCTOR SPETROMETRY	Body part: soft tissues (including the digestive tract, gills, heart, gonads and associated glands)Sampling method: Angle; Multiple specimens from the same sampling site were analyzed as composite samples
BIOTA	38	30	0	N	149	0	0	E	38.5	149	2011-12-10	14:45:00	2011-12-10	238U	=	Bq/kg ww	10.44	0.86	Ommastrephes bartramii	NOT LISTED	2200	XTJ5-2	NOT LISTED	DRY ASHING ONLY	OVEN DRYING	GAMMA SEMICONDUCTOR SPETROMETRY	Body part: soft tissues (including the digestive tract, gills, heart, gonads and associated glands)Sampling method: Angle; Multiple specimens from the same sampling site were analyzed as composite samples
BIOTA	38	30	0	N	149	0	0	E	38.5	149	2011-12-10	14:45:00	2011-12-10	40K	=	Bq/kg ww	53.64	3.66	Ommastrephes bartramii	NOT LISTED	2200	XTJ5-2	NOT LISTED	DRY ASHING ONLY	OVEN DRYING	GAMMA SEMICONDUCTOR SPETROMETRY	Body part: soft tissues (including the digestive tract, gills, heart, gonads and associated glands)Sampling method: Angle; Multiple specimens from the same sampling site were analyzed as composite samples
BIOTA	38	30	0	N	149	0	0	E	38.5	149	2011-12-10	14:45:00	2011-12-10	226Ra	=	Bq/kg ww	0.53	0.04	Ommastrephes bartramii	NOT LISTED	2200	XTJ5-2	NOT LISTED	DRY ASHING ONLY	OVEN DRYING	GAMMA SEMICONDUCTOR SPETROMETRY	Body part: soft tissues (including the digestive tract, gills, heart, gonads and associated glands)Sampling method: Angle; Multiple specimens from the same sampling site were analyzed as composite samples
BIOTA	38	30	0	N	149	0	0	E	38.5	149	2011-12-10	14:45:00	2011-12-10	137Cs	=	Bq/kg ww	0.21	0.02	Ommastrephes bartramii	FLESH WITHOUT BONES	9320	XTJ5-2	NOT LISTED	DRY ASHING ONLY	OVEN DRYING	GAMMA SEMICONDUCTOR SPETROMETRY	Sampling method: Angle; Multiple specimens from the same sampling site were analyzed as composite samples
BIOTA	38	30	0	N	149	0	0	E	38.5	149	2011-12-10	14:45:00	2011-12-10	134Cs	=	Bq/kg ww	0.24	0.01	Ommastrephes bartramii	FLESH WITHOUT BONES	9320	XTJ5-2	NOT LISTED	DRY ASHING ONLY	OVEN DRYING	GAMMA SEMICONDUCTOR SPETROMETRY	Sampling method: Angle; Multiple specimens from the same sampling site were analyzed as composite samples
BIOTA	38	30	0	N	149	0	0	E	38.5	149	2011-12-10	14:45:00	2011-12-10	110m Ag	=	Bq/kg ww	1.29	0.04	Ommastrephes bartramii	FLESH WITHOUT BONES	9320	XTJ5-2	NOT LISTED	DRY ASHING ONLY	OVEN DRYING	GAMMA SEMICONDUCTOR SPETROMETRY	Sampling method: Angle; Multiple specimens from the same sampling site were analyzed as composite samples
BIOTA	38	30	0	N	149	0	0	E	38.5	149	2011-12-10	14:45:00	2011-12-10	238U	=	Bq/kg ww	1.77	0.14	Ommastrephes bartramii	FLESH WITHOUT BONES	9320	XTJ5-2	NOT LISTED	DRY ASHING ONLY	OVEN DRYING	GAMMA SEMICONDUCTOR SPETROMETRY	Sampling method: Angle; Multiple specimens from the same sampling site were analyzed as composite samples
BIOTA	38	30	0	N	149	0	0	E	38.5	149	2011-12-10	14:45:00	2011-12-10	40K	=	Bq/kg ww	73.26	4.88	Ommastrephes bartramii	FLESH WITHOUT BONES	9320	XTJ5-2	NOT LISTED	DRY ASHING ONLY	OVEN DRYING	GAMMA SEMICONDUCTOR SPETROMETRY	Sampling method: Angle; Multiple specimens from the same sampling site were analyzed as composite samples
BIOTA	38	30	0	N	149	0	0	E	38.5	149	2011-12-10	14:45:00	2011-12-10	226Ra	=	Bq/kg ww	0.05	0	Ommastrephes bartramii	FLESH WITHOUT BONES	9320	XTJ5-2	NOT LISTED	DRY ASHING ONLY	OVEN DRYING	GAMMA SEMICONDUCTOR SPETROMETRY	Sampling method: Angle; Multiple specimens from the same sampling site were analyzed as composite samples
BIOTA	38	30	0	N	149	0	0	E	38.5	149	2011-12-10	14:45:00	2011-12-10	137Cs	=	Bq/kg ww	0.2	0.02	Ommastrephes bartramii	NOT LISTED	1530	XTJ5-2	NOT LISTED	DRY ASHING ONLY	OVEN DRYING	GAMMA SEMICONDUCTOR SPETROMETRY	Body part: soft tissues (including the digestive tract, gills, heart, gonads and associated glands)Sampling method: Angle; Multiple specimens from the same sampling site were analyzed as composite samples
BIOTA	38	30	0	N	149	0	0	E	38.5	149	2011-12-10	14:45:00	2011-12-10	134Cs	=	Bq/kg ww	0.34	0.03	Ommastrephes bartramii	NOT LISTED	1530	XTJ5-2	NOT LISTED	DRY ASHING ONLY	OVEN DRYING	GAMMA SEMICONDUCTOR SPETROMETRY	Body part: soft tissues (including the digestive tract, gills, heart, gonads and associated glands)Sampling method: Angle; Multiple specimens from the same sampling site were analyzed as composite samples
BIOTA	38	30	0	N	149	0	0	E	38.5	149	2011-12-10	14:45:00	2011-12-10	110m Ag	=	Bq/kg ww	56.27	1.86	Ommastrephes bartramii	NOT LISTED	1530	XTJ5-2	NOT LISTED	DRY ASHING ONLY	OVEN DRYING	GAMMA SEMICONDUCTOR SPETROMETRY	Body part: soft tissues (including the digestive tract, gills, heart, gonads and associated glands)Sampling method: Angle; Multiple specimens from the same sampling site were analyzed as composite samples
BIOTA	38	30	0	N	149	0	0	E	38.5	149	2011-12-10	14:45:00	2011-12-10	238U	=	Bq/kg ww	26.89	2.14	Ommastrephes bartramii	NOT LISTED	1530	XTJ5-2	NOT LISTED	DRY ASHING ONLY	OVEN DRYING	GAMMA SEMICONDUCTOR SPETROMETRY	Body part: soft tissues (including the digestive tract, gills, heart, gonads and associated glands)Sampling method: Angle; Multiple specimens from the same sampling site were analyzed as composite samples
BIOTA	38	30	0	N	149	0	0	E	38.5	149	2011-12-10	14:45:00	2011-12-10	40K	=	Bq/kg ww	72.37	5.03	Ommastrephes bartramii	NOT LISTED	1530	XTJ5-2	NOT LISTED	DRY ASHING ONLY	OVEN DRYING	GAMMA SEMICONDUCTOR SPETROMETRY	Body part: soft tissues (including the digestive tract, gills, heart, gonads and associated glands)Sampling method: Angle; Multiple specimens from the same sampling site were analyzed as composite samples
BIOTA	38	30	0	N	149	0	0	E	38.5	149	2011-12-10	14:45:00	2011-12-10	226Ra	=	Bq/kg ww	0.89	0.07	Ommastrephes bartramii	NOT LISTED	1530	XTJ5-2	NOT LISTED	DRY ASHING ONLY	OVEN DRYING	GAMMA SEMICONDUCTOR SPETROMETRY	Body part: soft tissues (including the digestive tract, gills, heart, gonads and associated glands)Sampling method: Angle; Multiple specimens from the same sampling site were analyzed as composite samples
BIOTA	39	0	0	N	147	0	0	E	39	147	2011-12-09	23:30:00	2011-12-10	137Cs	=	Bq/kg ww	0.31	0.02	Ommastrephes bartramii	FLESH WITHOUT BONES	6590	XTW1-6	NOT LISTED	DRY ASHING ONLY	OVEN DRYING	GAMMA SEMICONDUCTOR SPETROMETRY	Sampling method: Angle; Multiple specimens from the same sampling site were analyzed as composite samples
BIOTA	39	0	0	N	147	0	0	E	39	147	2011-12-09	23:30:00	2011-12-10	134Cs	=	Bq/kg ww	0.27	0.02	Ommastrephes bartramii	FLESH WITHOUT BONES	6590	XTW1-6	NOT LISTED	DRY ASHING ONLY	OVEN DRYING	GAMMA SEMICONDUCTOR SPETROMETRY	Sampling method: Angle; Multiple specimens from the same sampling site were analyzed as composite samples
BIOTA	39	0	0	N	147	0	0	E	39	147	2011-12-09	23:30:00	2011-12-10	110m Ag	=	Bq/kg ww	0.33	0.01	Ommastrephes bartramii	FLESH WITHOUT BONES	6590	XTW1-6	NOT LISTED	DRY ASHING ONLY	OVEN DRYING	GAMMA SEMICONDUCTOR SPETROMETRY	Sampling method: Angle; Multiple specimens from the same sampling site were analyzed as composite samples
BIOTA	39	0	0	N	147	0	0	E	39	147	2011-12-09	23:30:00	2011-12-10	238U	=	Bq/kg ww	0.94	0.11	Ommastrephes bartramii	FLESH WITHOUT BONES	6590	XTW1-6	NOT LISTED	DRY ASHING ONLY	OVEN DRYING	GAMMA SEMICONDUCTOR SPETROMETRY	Sampling method: Angle; Multiple specimens from the same sampling site were analyzed as composite samples
BIOTA	39	0	0	N	147	0	0	E	39	147	2011-12-09	23:30:00	2011-12-10	40K	=	Bq/kg ww	89.43	5.98	Ommastrephes bartramii	FLESH WITHOUT BONES	6590	XTW1-6	NOT LISTED	DRY ASHING ONLY	OVEN DRYING	GAMMA SEMICONDUCTOR SPETROMETRY	Sampling method: Angle; Multiple specimens from the same sampling site were analyzed as composite samples
BIOTA	39	0	0	N	147	0	0	E	39	147	2011-12-09	23:30:00	2011-12-10	226Ra	=	Bq/kg ww	0.07	0.01	Ommastrephes bartramii	FLESH WITHOUT BONES	6590	XTW1-6	NOT LISTED	DRY ASHING ONLY	OVEN DRYING	GAMMA SEMICONDUCTOR SPETROMETRY	Sampling method: Angle; Multiple specimens from the same sampling site were analyzed as composite samples
BIOTA	39	0	0	N	147	0	0	E	39	147	2011-12-09	23:30:00	2011-12-10	137Cs	=	Bq/kg ww	0	0	Ommastrephes bartramii	NOT LISTED	1500	XTW1-6	NOT LISTED	DRY ASHING ONLY	OVEN DRYING	GAMMA SEMICONDUCTOR SPETROMETRY	Body part: soft tissues (including the digestive tract, gills, heart, gonads and associated glands)Sampling method: Angle; Multiple specimens from the same sampling site were analyzed as composite samples
BIOTA	39	0	0	N	147	0	0	E	39	147	2011-12-09	23:30:00	2011-12-10	134Cs	=	Bq/kg ww	0.14	0.01	Ommastrephes bartramii	NOT LISTED	1500	XTW1-6	NOT LISTED	DRY ASHING ONLY	OVEN DRYING	GAMMA SEMICONDUCTOR SPETROMETRY	Body part: soft tissues (including the digestive tract, gills, heart, gonads and associated glands)Sampling method: Angle; Multiple specimens from the same sampling site were analyzed as composite samples
BIOTA	39	0	0	N	147	0	0	E	39	147	2011-12-09	23:30:00	2011-12-10	110m Ag	=	Bq/kg ww	40.5	1.34	Ommastrephes bartramii	NOT LISTED	1500	XTW1-6	NOT LISTED	DRY ASHING ONLY	OVEN DRYING	GAMMA SEMICONDUCTOR SPETROMETRY	Body part: soft tissues (including the digestive tract, gills, heart, gonads and associated glands)Sampling method: Angle; Multiple specimens from the same sampling site were analyzed as composite samples
BIOTA	39	0	0	N	147	0	0	E	39	147	2011-12-09	23:30:00	2011-12-10	238U	=	Bq/kg ww	0	0	Ommastrephes bartramii	NOT LISTED	1500	XTW1-6	NOT LISTED	DRY ASHING ONLY	OVEN DRYING	GAMMA SEMICONDUCTOR SPETROMETRY	Body part: soft tissues (including the digestive tract, gills, heart, gonads and associated glands)Sampling method: Angle; Multiple specimens from the same sampling site were analyzed as composite samples
BIOTA	39	0	0	N	147	0	0	E	39	147	2011-12-09	23:30:00	2011-12-10	40K	=	Bq/kg ww	53.76	3.69	Ommastrephes bartramii	NOT LISTED	1500	XTW1-6	NOT LISTED	DRY ASHING ONLY	OVEN DRYING	GAMMA SEMICONDUCTOR SPETROMETRY	Body part: soft tissues (including the digestive tract, gills, heart, gonads and associated glands)Sampling method: Angle; Multiple specimens from the same sampling site were analyzed as composite samples
BIOTA	39	0	0	N	147	0	0	E	39	147	2011-12-09	23:30:00	2011-12-10	226Ra	=	Bq/kg ww	0.06	0.03	Ommastrephes bartramii	NOT LISTED	1500	XTW1-6	NOT LISTED	DRY ASHING ONLY	OVEN DRYING	GAMMA SEMICONDUCTOR SPETROMETRY	Body part: soft tissues (including the digestive tract, gills, heart, gonads and associated glands)Sampling method: Angle; Multiple specimens from the same sampling site were analyzed as composite samples
BIOTA	39	0	0	N	147	0	0	E	39	147	2011-12-09	23:30:00	2011-12-10	137Cs	=	Bq/kg ww	0.31	0.02	Ommastrephes bartramii	FLESH WITHOUT BONES	8140	XTW1-6	NOT LISTED	DRY ASHING ONLY	OVEN DRYING	GAMMA SEMICONDUCTOR SPETROMETRY	Sampling method: Angle; Multiple specimens from the same sampling site were analyzed as composite samples
BIOTA	39	0	0	N	147	0	0	E	39	147	2011-12-09	23:30:00	2011-12-10	134Cs	=	Bq/kg ww	0.26	0.02	Ommastrephes bartramii	FLESH WITHOUT BONES	8140	XTW1-6	NOT LISTED	DRY ASHING ONLY	OVEN DRYING	GAMMA SEMICONDUCTOR SPETROMETRY	Sampling method: Angle; Multiple specimens from the same sampling site were analyzed as composite samples
BIOTA	39	0	0	N	147	0	0	E	39	147	2011-12-09	23:30:00	2011-12-10	110m Ag	=	Bq/kg ww	0.46	0.02	Ommastrephes bartramii	FLESH WITHOUT BONES	8140	XTW1-6	NOT LISTED	DRY ASHING ONLY	OVEN DRYING	GAMMA SEMICONDUCTOR SPETROMETRY	Sampling method: Angle; Multiple specimens from the same sampling site were analyzed as composite samples
BIOTA	39	0	0	N	147	0	0	E	39	147	2011-12-09	23:30:00	2011-12-10	238U	=	Bq/kg ww	0.16	0.04	Ommastrephes bartramii	FLESH WITHOUT BONES	8140	XTW1-6	NOT LISTED	DRY ASHING ONLY	OVEN DRYING	GAMMA SEMICONDUCTOR SPETROMETRY	Sampling method: Angle; Multiple specimens from the same sampling site were analyzed as composite samples
BIOTA	39	0	0	N	147	0	0	E	39	147	2011-12-09	23:30:00	2011-12-10	40K	=	Bq/kg ww	72.47	4.83	Ommastrephes bartramii	FLESH WITHOUT BONES	8140	XTW1-6	NOT LISTED	DRY ASHING ONLY	OVEN DRYING	GAMMA SEMICONDUCTOR SPETROMETRY	Sampling method: Angle; Multiple specimens from the same sampling site were analyzed as composite samples
BIOTA	39	0	0	N	147	0	0	E	39	147	2011-12-09	23:30:00	2011-12-10	226Ra	=	Bq/kg ww	0	0	Ommastrephes bartramii	FLESH WITHOUT BONES	8140	XTW1-6	NOT LISTED	DRY ASHING ONLY	OVEN DRYING	GAMMA SEMICONDUCTOR SPETROMETRY	Sampling method: Angle; Multiple specimens from the same sampling site were analyzed as composite samples
BIOTA	39	0	0	N	147	0	0	E	39	147	2011-12-09	23:30:00	2011-12-10	137Cs	=	Bq/kg ww	0	0	Ommastrephes bartramii	NOT LISTED	1790	XTW1-6	NOT LISTED	DRY ASHING ONLY	OVEN DRYING	GAMMA SEMICONDUCTOR SPETROMETRY	Body part: soft tissues (including the digestive tract, gills, heart, gonads and associated glands)Sampling method: Angle; Multiple specimens from the same sampling site were analyzed as composite samples
BIOTA	39	0	0	N	147	0	0	E	39	147	2011-12-09	23:30:00	2011-12-10	134Cs	=	Bq/kg ww	0.11	0	Ommastrephes bartramii	NOT LISTED	1790	XTW1-6	NOT LISTED	DRY ASHING ONLY	OVEN DRYING	GAMMA SEMICONDUCTOR SPETROMETRY	Body part: soft tissues (including the digestive tract, gills, heart, gonads and associated glands)Sampling method: Angle; Multiple specimens from the same sampling site were analyzed as composite samples
BIOTA	39	0	0	N	147	0	0	E	39	147	2011-12-09	23:30:00	2011-12-10	110m Ag	=	Bq/kg ww	30.86	1.02	Ommastrephes bartramii	NOT LISTED	1790	XTW1-6	NOT LISTED	DRY ASHING ONLY	OVEN DRYING	GAMMA SEMICONDUCTOR SPETROMETRY	Body part: soft tissues (including the digestive tract, gills, heart, gonads and associated glands)Sampling method: Angle; Multiple specimens from the same sampling site were analyzed as composite samples
BIOTA	39	0	0	N	147	0	0	E	39	147	2011-12-09	23:30:00	2011-12-10	238U	=	Bq/kg ww	2.37	0.31	Ommastrephes bartramii	NOT LISTED	1790	XTW1-6	NOT LISTED	DRY ASHING ONLY	OVEN DRYING	GAMMA SEMICONDUCTOR SPETROMETRY	Body part: soft tissues (including the digestive tract, gills, heart, gonads and associated glands)Sampling method: Angle; Multiple specimens from the same sampling site were analyzed as composite samples
BIOTA	39	0	0	N	147	0	0	E	39	147	2011-12-09	23:30:00	2011-12-10	40K	=	Bq/kg ww	51.85	3.57	Ommastrephes bartramii	NOT LISTED	1790	XTW1-6	NOT LISTED	DRY ASHING ONLY	OVEN DRYING	GAMMA SEMICONDUCTOR SPETROMETRY	Body part: soft tissues (including the digestive tract, gills, heart, gonads and associated glands)Sampling method: Angle; Multiple specimens from the same sampling site were analyzed as composite samples
BIOTA	39	0	0	N	147	0	0	E	39	147	2011-12-09	23:30:00	2011-12-10	226Ra	=	Bq/kg ww	0.15	0.03	Ommastrephes bartramii	NOT LISTED	1790	XTW1-6	NOT LISTED	DRY ASHING ONLY	OVEN DRYING	GAMMA SEMICONDUCTOR SPETROMETRY	Body part: soft tissues (including the digestive tract, gills, heart, gonads and associated glands)Sampling method: Angle; Multiple specimens from the same sampling site were analyzed as composite samples
BIOTA	39	0	0	N	147	0	0	E	39	147	2011-12-09	23:30:00	2011-12-10	137Cs	=	Bq/kg ww	0.34	0.03	Ommastrephes bartramii	FLESH WITHOUT BONES	6670	XTW1-6	NOT LISTED	DRY ASHING ONLY	OVEN DRYING	GAMMA SEMICONDUCTOR SPETROMETRY	Sampling method: Angle; Multiple specimens from the same sampling site were analyzed as composite samples
BIOTA	39	0	0	N	147	0	0	E	39	147	2011-12-09	23:30:00	2011-12-10	134Cs	=	Bq/kg ww	0.27	0.02	Ommastrephes bartramii	FLESH WITHOUT BONES	6670	XTW1-6	NOT LISTED	DRY ASHING ONLY	OVEN DRYING	GAMMA SEMICONDUCTOR SPETROMETRY	Sampling method: Angle; Multiple specimens from the same sampling site were analyzed as composite samples
BIOTA	39	0	0	N	147	0	0	E	39	147	2011-12-09	23:30:00	2011-12-10	110m Ag	=	Bq/kg ww	0.65	0.02	Ommastrephes bartramii	FLESH WITHOUT BONES	6670	XTW1-6	NOT LISTED	DRY ASHING ONLY	OVEN DRYING	GAMMA SEMICONDUCTOR SPETROMETRY	Sampling method: Angle; Multiple specimens from the same sampling site were analyzed as composite samples
BIOTA	39	0	0	N	147	0	0	E	39	147	2011-12-09	23:30:00	2011-12-10	238U	=	Bq/kg ww	0.41	0.07	Ommastrephes bartramii	FLESH WITHOUT BONES	6670	XTW1-6	NOT LISTED	DRY ASHING ONLY	OVEN DRYING	GAMMA SEMICONDUCTOR SPETROMETRY	Sampling method: Angle; Multiple specimens from the same sampling site were analyzed as composite samples
BIOTA	39	0	0	N	147	0	0	E	39	147	2011-12-09	23:30:00	2011-12-10	40K	=	Bq/kg ww	78.88	5.26	Ommastrephes bartramii	FLESH WITHOUT BONES	6670	XTW1-6	NOT LISTED	DRY ASHING ONLY	OVEN DRYING	GAMMA SEMICONDUCTOR SPETROMETRY	Sampling method: Angle; Multiple specimens from the same sampling site were analyzed as composite samples
BIOTA	39	0	0	N	147	0	0	E	39	147	2011-12-09	23:30:00	2011-12-10	226Ra	=	Bq/kg ww	0	0	Ommastrephes bartramii	FLESH WITHOUT BONES	6670	XTW1-6	NOT LISTED	DRY ASHING ONLY	OVEN DRYING	GAMMA SEMICONDUCTOR SPETROMETRY	Sampling method: Angle; Multiple specimens from the same sampling site were analyzed as composite samples
BIOTA	39	0	0	N	147	0	0	E	39	147	2011-12-09	23:30:00	2011-12-10	137Cs	=	Bq/kg ww	0.33	0.03	Ommastrephes bartramii	NOT LISTED	1230	XTW1-6	NOT LISTED	DRY ASHING ONLY	OVEN DRYING	GAMMA SEMICONDUCTOR SPETROMETRY	Body part: soft tissues (including the digestive tract, gills, heart, gonads and associated glands)Sampling method: Angle; Multiple specimens from the same sampling site were analyzed as composite samples
BIOTA	39	0	0	N	147	0	0	E	39	147	2011-12-09	23:30:00	2011-12-10	134Cs	=	Bq/kg ww	0.19	0.02	Ommastrephes bartramii	NOT LISTED	1230	XTW1-6	NOT LISTED	DRY ASHING ONLY	OVEN DRYING	GAMMA SEMICONDUCTOR SPETROMETRY	Body part: soft tissues (including the digestive tract, gills, heart, gonads and associated glands)Sampling method: Angle; Multiple specimens from the same sampling site were analyzed as composite samples
BIOTA	39	0	0	N	147	0	0	E	39	147	2011-12-09	23:30:00	2011-12-10	110m Ag	=	Bq/kg ww	53.64	1.77	Ommastrephes bartramii	NOT LISTED	1230	XTW1-6	NOT LISTED	DRY ASHING ONLY	OVEN DRYING	GAMMA SEMICONDUCTOR SPETROMETRY	Body part: soft tissues (including the digestive tract, gills, heart, gonads and associated glands)Sampling method: Angle; Multiple specimens from the same sampling site were analyzed as composite samples
BIOTA	39	0	0	N	147	0	0	E	39	147	2011-12-09	23:30:00	2011-12-10	238U	=	Bq/kg ww	12	1.04	Ommastrephes bartramii	NOT LISTED	1230	XTW1-6	NOT LISTED	DRY ASHING ONLY	OVEN DRYING	GAMMA SEMICONDUCTOR SPETROMETRY	Body part: soft tissues (including the digestive tract, gills, heart, gonads and associated glands)Sampling method: Angle; Multiple specimens from the same sampling site were analyzed as composite samples
BIOTA	39	0	0	N	147	0	0	E	39	147	2011-12-09	23:30:00	2011-12-10	40K	=	Bq/kg ww	65.3	4.54	Ommastrephes bartramii	NOT LISTED	1230	XTW1-6	NOT LISTED	DRY ASHING ONLY	OVEN DRYING	GAMMA SEMICONDUCTOR SPETROMETRY	Body part: soft tissues (including the digestive tract, gills, heart, gonads and associated glands)Sampling method: Angle; Multiple specimens from the same sampling site were analyzed as composite samples
BIOTA	39	0	0	N	147	0	0	E	39	147	2011-12-09	23:30:00	2011-12-10	226Ra	=	Bq/kg ww	0.44	0.05	Ommastrephes bartramii	NOT LISTED	1230	XTW1-6	NOT LISTED	DRY ASHING ONLY	OVEN DRYING	GAMMA SEMICONDUCTOR SPETROMETRY	Body part: soft tissues (including the digestive tract, gills, heart, gonads and associated glands)Sampling method: Angle; Multiple specimens from the same sampling site were analyzed as composite samples
BIOTA	37	28	0	N	146	0	0	E	37.4	146	2011-12-08	18:50:00	2011-12-08	137Cs	=	Bq/kg ww	0.41	0.03	Ommastrephes bartramii	FLESH WITHOUT BONES	6110	XTW2-7	NOT LISTED	DRY ASHING ONLY	OVEN DRYING	GAMMA SEMICONDUCTOR SPETROMETRY	Sampling method: Angle; Multiple specimens from the same sampling site were analyzed as composite samples
BIOTA	37	28	0	N	146	0	0	E	37.4	146	2011-12-08	18:50:00	2011-12-08	134Cs	=	Bq/kg ww	0.34	0.02	Ommastrephes bartramii	FLESH WITHOUT BONES	6110	XTW2-7	NOT LISTED	DRY ASHING ONLY	OVEN DRYING	GAMMA SEMICONDUCTOR SPETROMETRY	Sampling method: Angle; Multiple specimens from the same sampling site were analyzed as composite samples
BIOTA	37	28	0	N	146	0	0	E	37.4	146	2011-12-08	18:50:00	2011-12-08	110m Ag	=	Bq/kg ww	0.41	0.16	Ommastrephes bartramii	FLESH WITHOUT BONES	6110	XTW2-7	NOT LISTED	DRY ASHING ONLY	OVEN DRYING	GAMMA SEMICONDUCTOR SPETROMETRY	Sampling method: Angle; Multiple specimens from the same sampling site were analyzed as composite samples
BIOTA	37	28	0	N	146	0	0	E	37.4	146	2011-12-08	18:50:00	2011-12-08	238U	=	Bq/kg ww	0.61	0.07	Ommastrephes bartramii	FLESH WITHOUT BONES	6110	XTW2-7	NOT LISTED	DRY ASHING ONLY	OVEN DRYING	GAMMA SEMICONDUCTOR SPETROMETRY	Sampling method: Angle; Multiple specimens from the same sampling site were analyzed as composite samples
BIOTA	37	28	0	N	146	0	0	E	37.4	146	2011-12-08	18:50:00	2011-12-08	40K	=	Bq/kg ww	78.78	5.26	Ommastrephes bartramii	FLESH WITHOUT BONES	6110	XTW2-7	NOT LISTED	DRY ASHING ONLY	OVEN DRYING	GAMMA SEMICONDUCTOR SPETROMETRY	Sampling method: Angle; Multiple specimens from the same sampling site were analyzed as composite samples
BIOTA	37	28	0	N	146	0	0	E	37.4	146	2011-12-08	18:50:00	2011-12-08	226Ra	=	Bq/kg ww	0.01	0	Ommastrephes bartramii	FLESH WITHOUT BONES	6110	XTW2-7	NOT LISTED	DRY ASHING ONLY	OVEN DRYING	GAMMA SEMICONDUCTOR SPETROMETRY	Sampling method: Angle; Multiple specimens from the same sampling site were analyzed as composite samples
BIOTA	37	28	0	N	146	0	0	E	37.4	146	2011-12-08	18:50:00	2011-12-08	137Cs	=	Bq/kg ww	0.06	0.01	Ommastrephes bartramii	NOT LISTED	1230	XTW2-7	NOT LISTED	DRY ASHING ONLY	OVEN DRYING	GAMMA SEMICONDUCTOR SPETROMETRY	Body part: soft tissues (including the digestive tract, gills, heart, gonads and associated glands)Sampling method: Angle; Multiple specimens from the same sampling site were analyzed as composite samples
BIOTA	37	28	0	N	146	0	0	E	37.4	146	2011-12-08	18:50:00	2011-12-08	134Cs	=	Bq/kg ww	0.05	0.01	Ommastrephes bartramii	NOT LISTED	1230	XTW2-7	NOT LISTED	DRY ASHING ONLY	OVEN DRYING	GAMMA SEMICONDUCTOR SPETROMETRY	Body part: soft tissues (including the digestive tract, gills, heart, gonads and associated glands)Sampling method: Angle; Multiple specimens from the same sampling site were analyzed as composite samples
BIOTA	37	28	0	N	146	0	0	E	37.4	146	2011-12-08	18:50:00	2011-12-08	110m Ag	=	Bq/kg ww	8.1	0.27	Ommastrephes bartramii	NOT LISTED	1230	XTW2-7	NOT LISTED	DRY ASHING ONLY	OVEN DRYING	GAMMA SEMICONDUCTOR SPETROMETRY	Body part: soft tissues (including the digestive tract, gills, heart, gonads and associated glands)Sampling method: Angle; Multiple specimens from the same sampling site were analyzed as composite samples
BIOTA	37	28	0	N	146	0	0	E	37.4	146	2011-12-08	18:50:00	2011-12-08	238U	=	Bq/kg ww	0	0	Ommastrephes bartramii	NOT LISTED	1230	XTW2-7	NOT LISTED	DRY ASHING ONLY	OVEN DRYING	GAMMA SEMICONDUCTOR SPETROMETRY	Body part: soft tissues (including the digestive tract, gills, heart, gonads and associated glands)Sampling method: Angle; Multiple specimens from the same sampling site were analyzed as composite samples
BIOTA	37	28	0	N	146	0	0	E	37.4	146	2011-12-08	18:50:00	2011-12-08	40K	=	Bq/kg ww	9.72	0.75	Ommastrephes bartramii	NOT LISTED	1230	XTW2-7	NOT LISTED	DRY ASHING ONLY	OVEN DRYING	GAMMA SEMICONDUCTOR SPETROMETRY	Body part: soft tissues (including the digestive tract, gills, heart, gonads and associated glands)Sampling method: Angle; Multiple specimens from the same sampling site were analyzed as composite samples
BIOTA	37	28	0	N	146	0	0	E	37.4	146	2011-12-08	18:50:00	2011-12-08	226Ra	=	Bq/kg ww	0	0	Ommastrephes bartramii	NOT LISTED	1230	XTW2-7	NOT LISTED	DRY ASHING ONLY	OVEN DRYING	GAMMA SEMICONDUCTOR SPETROMETRY	Body part: soft tissues (including the digestive tract, gills, heart, gonads and associated glands)Sampling method: Angle; Multiple specimens from the same sampling site were analyzed as composite samples
BIOTA	37	28	0	N	146	30	0	E	37.4	146.5	2011-12-08	23:40:00	2011-12-09	137Cs	=	Bq/kg ww	0.46	0.04	Ommastrephes bartramii	FLESH WITHOUT BONES	6760	XTW2-8	NOT LISTED	DRY ASHING ONLY	OVEN DRYING	GAMMA SEMICONDUCTOR SPETROMETRY	Sampling method: Angle; Multiple specimens from the same sampling site were analyzed as composite samples
BIOTA	37	28	0	N	146	30	0	E	37.4	146.5	2011-12-08	23:40:00	2011-12-09	134Cs	=	Bq/kg ww	0.39	0.04	Ommastrephes bartramii	FLESH WITHOUT BONES	6760	XTW2-8	NOT LISTED	DRY ASHING ONLY	OVEN DRYING	GAMMA SEMICONDUCTOR SPETROMETRY	Sampling method: Angle; Multiple specimens from the same sampling site were analyzed as composite samples
BIOTA	37	28	0	N	146	30	0	E	37.4	146.5	2011-12-08	23:40:00	2011-12-09	110m Ag	=	Bq/kg ww	0.36	0.02	Ommastrephes bartramii	FLESH WITHOUT BONES	6760	XTW2-8	NOT LISTED	DRY ASHING ONLY	OVEN DRYING	GAMMA SEMICONDUCTOR SPETROMETRY	Sampling method: Angle; Multiple specimens from the same sampling site were analyzed as composite samples
BIOTA	37	28	0	N	146	30	0	E	37.4	146.5	2011-12-08	23:40:00	2011-12-09	238U	=	Bq/kg ww	0.66	0.09	Ommastrephes bartramii	FLESH WITHOUT BONES	6760	XTW2-8	NOT LISTED	DRY ASHING ONLY	OVEN DRYING	GAMMA SEMICONDUCTOR SPETROMETRY	Sampling method: Angle; Multiple specimens from the same sampling site were analyzed as composite samples
BIOTA	37	28	0	N	146	30	0	E	37.4	146.5	2011-12-08	23:40:00	2011-12-09	40K	=	Bq/kg ww	79.13	5.31	Ommastrephes bartramii	FLESH WITHOUT BONES	6760	XTW2-8	NOT LISTED	DRY ASHING ONLY	OVEN DRYING	GAMMA SEMICONDUCTOR SPETROMETRY	Sampling method: Angle; Multiple specimens from the same sampling site were analyzed as composite samples
BIOTA	37	28	0	N	146	30	0	E	37.4	146.5	2011-12-08	23:40:00	2011-12-09	226Ra	=	Bq/kg ww	0.02	0.01	Ommastrephes bartramii	FLESH WITHOUT BONES	6760	XTW2-8	NOT LISTED	DRY ASHING ONLY	OVEN DRYING	GAMMA SEMICONDUCTOR SPETROMETRY	Sampling method: Angle; Multiple specimens from the same sampling site were analyzed as composite samples
BIOTA	37	28	0	N	146	30	0	E	37.4	146.5	2011-12-08	23:40:00	2011-12-09	137Cs	=	Bq/kg ww	0	0	Ommastrephes bartramii	NOT LISTED	1520	XTW2-8	NOT LISTED	DRY ASHING ONLY	OVEN DRYING	GAMMA SEMICONDUCTOR SPETROMETRY	Body part: soft tissues (including the digestive tract, gills, heart, gonads and associated glands)Sampling method: Angle; Multiple specimens from the same sampling site were analyzed as composite samples
BIOTA	37	28	0	N	146	30	0	E	37.4	146.5	2011-12-08	23:40:00	2011-12-09	134Cs	=	Bq/kg ww	0.24	0.02	Ommastrephes bartramii	NOT LISTED	1520	XTW2-8	NOT LISTED	DRY ASHING ONLY	OVEN DRYING	GAMMA SEMICONDUCTOR SPETROMETRY	Body part: soft tissues (including the digestive tract, gills, heart, gonads and associated glands)Sampling method: Angle; Multiple specimens from the same sampling site were analyzed as composite samples
BIOTA	37	28	0	N	146	30	0	E	37.4	146.5	2011-12-08	23:40:00	2011-12-09	110m Ag	=	Bq/kg ww	34.53	1.14	Ommastrephes bartramii	NOT LISTED	1520	XTW2-8	NOT LISTED	DRY ASHING ONLY	OVEN DRYING	GAMMA SEMICONDUCTOR SPETROMETRY	Body part: soft tissues (including the digestive tract, gills, heart, gonads and associated glands)Sampling method: Angle; Multiple specimens from the same sampling site were analyzed as composite samples
BIOTA	37	28	0	N	146	30	0	E	37.4	146.5	2011-12-08	23:40:00	2011-12-09	238U	=	Bq/kg ww	0	0	Ommastrephes bartramii	NOT LISTED	1520	XTW2-8	NOT LISTED	DRY ASHING ONLY	OVEN DRYING	GAMMA SEMICONDUCTOR SPETROMETRY	Body part: soft tissues (including the digestive tract, gills, heart, gonads and associated glands)Sampling method: Angle; Multiple specimens from the same sampling site were analyzed as composite samples
BIOTA	37	28	0	N	146	30	0	E	37.4	146.5	2011-12-08	23:40:00	2011-12-09	40K	=	Bq/kg ww	58.88	4.03	Ommastrephes bartramii	NOT LISTED	1520	XTW2-8	NOT LISTED	DRY ASHING ONLY	OVEN DRYING	GAMMA SEMICONDUCTOR SPETROMETRY	Body part: soft tissues (including the digestive tract, gills, heart, gonads and associated glands)Sampling method: Angle; Multiple specimens from the same sampling site were analyzed as composite samples
BIOTA	37	28	0	N	146	30	0	E	37.4	146.5	2011-12-08	23:40:00	2011-12-09	226Ra	=	Bq/kg ww	0.17	0.03	Ommastrephes bartramii	NOT LISTED	1520	XTW2-8	NOT LISTED	DRY ASHING ONLY	OVEN DRYING	GAMMA SEMICONDUCTOR SPETROMETRY	Body part: soft tissues (including the digestive tract, gills, heart, gonads and associated glands)Sampling method: Angle; Multiple specimens from the same sampling site were analyzed as composite samples
BIOTA	37	28	0	N	146	30	0	E	37.4	146.5	2011-12-08	23:40:00	2011-12-09	137Cs	=	Bq/kg ww	0.41	0.03	Ommastrephes bartramii	FLESH WITHOUT BONES	8030	XTW2-8	NOT LISTED	DRY ASHING ONLY	OVEN DRYING	GAMMA SEMICONDUCTOR SPETROMETRY	Sampling method: Angle; Multiple specimens from the same sampling site were analyzed as composite samples
BIOTA	37	28	0	N	146	30	0	E	37.4	146.5	2011-12-08	23:40:00	2011-12-09	134Cs	=	Bq/kg ww	0.33	0.02	Ommastrephes bartramii	FLESH WITHOUT BONES	8030	XTW2-8	NOT LISTED	DRY ASHING ONLY	OVEN DRYING	GAMMA SEMICONDUCTOR SPETROMETRY	Sampling method: Angle; Multiple specimens from the same sampling site were analyzed as composite samples
BIOTA	37	28	0	N	146	30	0	E	37.4	146.5	2011-12-08	23:40:00	2011-12-09	110m Ag	=	Bq/kg ww	0.4	0.02	Ommastrephes bartramii	FLESH WITHOUT BONES	8030	XTW2-8	NOT LISTED	DRY ASHING ONLY	OVEN DRYING	GAMMA SEMICONDUCTOR SPETROMETRY	Sampling method: Angle; Multiple specimens from the same sampling site were analyzed as composite samples
BIOTA	37	28	0	N	146	30	0	E	37.4	146.5	2011-12-08	23:40:00	2011-12-09	238U	=	Bq/kg ww	0.23	0.06	Ommastrephes bartramii	FLESH WITHOUT BONES	8030	XTW2-8	NOT LISTED	DRY ASHING ONLY	OVEN DRYING	GAMMA SEMICONDUCTOR SPETROMETRY	Sampling method: Angle; Multiple specimens from the same sampling site were analyzed as composite samples
BIOTA	37	28	0	N	146	30	0	E	37.4	146.5	2011-12-08	23:40:00	2011-12-09	40K	=	Bq/kg ww	75.31	5.05	Ommastrephes bartramii	FLESH WITHOUT BONES	8030	XTW2-8	NOT LISTED	DRY ASHING ONLY	OVEN DRYING	GAMMA SEMICONDUCTOR SPETROMETRY	Sampling method: Angle; Multiple specimens from the same sampling site were analyzed as composite samples
BIOTA	37	28	0	N	146	30	0	E	37.4	146.5	2011-12-08	23:40:00	2011-12-09	226Ra	=	Bq/kg ww	0	0	Ommastrephes bartramii	FLESH WITHOUT BONES	8030	XTW2-8	NOT LISTED	DRY ASHING ONLY	OVEN DRYING	GAMMA SEMICONDUCTOR SPETROMETRY	Sampling method: Angle; Multiple specimens from the same sampling site were analyzed as composite samples
BIOTA	37	28	0	N	146	30	0	E	37.4	146.5	2011-12-08	23:40:00	2011-12-09	137Cs	=	Bq/kg ww	0	0	Ommastrephes bartramii	NOT LISTED	1770	XTW2-8	NOT LISTED	DRY ASHING ONLY	OVEN DRYING	GAMMA SEMICONDUCTOR SPETROMETRY	Body part: soft tissues (including the digestive tract, gills, heart, gonads and associated glands)Sampling method: Angle; Multiple specimens from the same sampling site were analyzed as composite samples
BIOTA	37	28	0	N	146	30	0	E	37.4	146.5	2011-12-08	23:40:00	2011-12-09	134Cs	=	Bq/kg ww	0.4	0.03	Ommastrephes bartramii	NOT LISTED	1770	XTW2-8	NOT LISTED	DRY ASHING ONLY	OVEN DRYING	GAMMA SEMICONDUCTOR SPETROMETRY	Body part: soft tissues (including the digestive tract, gills, heart, gonads and associated glands)Sampling method: Angle; Multiple specimens from the same sampling site were analyzed as composite samples
BIOTA	37	28	0	N	146	30	0	E	37.4	146.5	2011-12-08	23:40:00	2011-12-09	110m Ag	=	Bq/kg ww	39.45	1.3	Ommastrephes bartramii	NOT LISTED	1770	XTW2-8	NOT LISTED	DRY ASHING ONLY	OVEN DRYING	GAMMA SEMICONDUCTOR SPETROMETRY	Body part: soft tissues (including the digestive tract, gills, heart, gonads and associated glands)Sampling method: Angle; Multiple specimens from the same sampling site were analyzed as composite samples
BIOTA	37	28	0	N	146	30	0	E	37.4	146.5	2011-12-08	23:40:00	2011-12-09	238U	=	Bq/kg ww	2.63	0.33	Ommastrephes bartramii	NOT LISTED	1770	XTW2-8	NOT LISTED	DRY ASHING ONLY	OVEN DRYING	GAMMA SEMICONDUCTOR SPETROMETRY	Body part: soft tissues (including the digestive tract, gills, heart, gonads and associated glands)Sampling method: Angle; Multiple specimens from the same sampling site were analyzed as composite samples
BIOTA	37	28	0	N	146	30	0	E	37.4	146.5	2011-12-08	23:40:00	2011-12-09	40K	=	Bq/kg ww	67.73	4.62	Ommastrephes bartramii	NOT LISTED	1770	XTW2-8	NOT LISTED	DRY ASHING ONLY	OVEN DRYING	GAMMA SEMICONDUCTOR SPETROMETRY	Body part: soft tissues (including the digestive tract, gills, heart, gonads and associated glands)Sampling method: Angle; Multiple specimens from the same sampling site were analyzed as composite samples
BIOTA	37	28	0	N	146	30	0	E	37.4	146.5	2011-12-08	23:40:00	2011-12-09	226Ra	=	Bq/kg ww	0.22	0.03	Ommastrephes bartramii	NOT LISTED	1770	XTW2-8	NOT LISTED	DRY ASHING ONLY	OVEN DRYING	GAMMA SEMICONDUCTOR SPETROMETRY	Body part: soft tissues (including the digestive tract, gills, heart, gonads and associated glands)Sampling method: Angle; Multiple specimens from the same sampling site were analyzed as composite samples
BIOTA	35	0	0	N	145	0	0	E	35	145	2011-12-06	22:00:00	2011-12-06	137Cs	=	Bq/kg ww	0.13	0.01	Ommastrephes bartramii	FLESH WITHOUT BONES	11190	XTW3-6	NOT LISTED	DRY ASHING ONLY	OVEN DRYING	GAMMA SEMICONDUCTOR SPETROMETRY	Sampling method: Angle; Multiple specimens from the same sampling site were analyzed as composite samples
BIOTA	35	0	0	N	145	0	0	E	35	145	2011-12-06	22:00:00	2011-12-06	134Cs	=	Bq/kg ww	0.09	0.01	Ommastrephes bartramii	FLESH WITHOUT BONES	11190	XTW3-6	NOT LISTED	DRY ASHING ONLY	OVEN DRYING	GAMMA SEMICONDUCTOR SPETROMETRY	Sampling method: Angle; Multiple specimens from the same sampling site were analyzed as composite samples
BIOTA	35	0	0	N	145	0	0	E	35	145	2011-12-06	22:00:00	2011-12-06	110m Ag	=	Bq/kg ww	0.06	0	Ommastrephes bartramii	FLESH WITHOUT BONES	11190	XTW3-6	NOT LISTED	DRY ASHING ONLY	OVEN DRYING	GAMMA SEMICONDUCTOR SPETROMETRY	Sampling method: Angle; Multiple specimens from the same sampling site were analyzed as composite samples
BIOTA	35	0	0	N	145	0	0	E	35	145	2011-12-06	22:00:00	2011-12-06	238U	=	Bq/kg ww	0.33	0.04	Ommastrephes bartramii	FLESH WITHOUT BONES	11190	XTW3-6	NOT LISTED	DRY ASHING ONLY	OVEN DRYING	GAMMA SEMICONDUCTOR SPETROMETRY	Sampling method: Angle; Multiple specimens from the same sampling site were analyzed as composite samples
BIOTA	35	0	0	N	145	0	0	E	35	145	2011-12-06	22:00:00	2011-12-06	40K	=	Bq/kg ww	67.62	4.5	Ommastrephes bartramii	FLESH WITHOUT BONES	11190	XTW3-6	NOT LISTED	DRY ASHING ONLY	OVEN DRYING	GAMMA SEMICONDUCTOR SPETROMETRY	Sampling method: Angle; Multiple specimens from the same sampling site were analyzed as composite samples
BIOTA	35	0	0	N	145	0	0	E	35	145	2011-12-06	22:00:00	2011-12-06	226Ra	=	Bq/kg ww	0.07	0	Ommastrephes bartramii	FLESH WITHOUT BONES	11190	XTW3-6	NOT LISTED	DRY ASHING ONLY	OVEN DRYING	GAMMA SEMICONDUCTOR SPETROMETRY	Sampling method: Angle; Multiple specimens from the same sampling site were analyzed as composite samples
BIOTA	35	0	0	N	145	0	0	E	35	145	2011-12-06	22:00:00	2011-12-06	137Cs	=	Bq/kg ww	0	0	Ommastrephes bartramii	NOT LISTED	2290	XTW3-6	NOT LISTED	DRY ASHING ONLY	OVEN DRYING	GAMMA SEMICONDUCTOR SPETROMETRY	Body part: soft tissues (including the digestive tract, gills, heart, gonads and associated glands)Sampling method: Angle; Multiple specimens from the same sampling site were analyzed as composite samples
BIOTA	35	0	0	N	145	0	0	E	35	145	2011-12-06	22:00:00	2011-12-06	134Cs	=	Bq/kg ww	0.08	0.01	Ommastrephes bartramii	NOT LISTED	2290	XTW3-6	NOT LISTED	DRY ASHING ONLY	OVEN DRYING	GAMMA SEMICONDUCTOR SPETROMETRY	Body part: soft tissues (including the digestive tract, gills, heart, gonads and associated glands)Sampling method: Angle; Multiple specimens from the same sampling site were analyzed as composite samples
BIOTA	35	0	0	N	145	0	0	E	35	145	2011-12-06	22:00:00	2011-12-06	110m Ag	=	Bq/kg ww	32.25	1.07	Ommastrephes bartramii	NOT LISTED	2290	XTW3-6	NOT LISTED	DRY ASHING ONLY	OVEN DRYING	GAMMA SEMICONDUCTOR SPETROMETRY	Body part: soft tissues (including the digestive tract, gills, heart, gonads and associated glands)Sampling method: Angle; Multiple specimens from the same sampling site were analyzed as composite samples
BIOTA	35	0	0	N	145	0	0	E	35	145	2011-12-06	22:00:00	2011-12-06	238U	=	Bq/kg ww	2.43	0.33	Ommastrephes bartramii	NOT LISTED	2290	XTW3-6	NOT LISTED	DRY ASHING ONLY	OVEN DRYING	GAMMA SEMICONDUCTOR SPETROMETRY	Body part: soft tissues (including the digestive tract, gills, heart, gonads and associated glands)Sampling method: Angle; Multiple specimens from the same sampling site were analyzed as composite samples
BIOTA	35	0	0	N	145	0	0	E	35	145	2011-12-06	22:00:00	2011-12-06	40K	=	Bq/kg ww	49.57	3.44	Ommastrephes bartramii	NOT LISTED	2290	XTW3-6	NOT LISTED	DRY ASHING ONLY	OVEN DRYING	GAMMA SEMICONDUCTOR SPETROMETRY	Body part: soft tissues (including the digestive tract, gills, heart, gonads and associated glands)Sampling method: Angle; Multiple specimens from the same sampling site were analyzed as composite samples
BIOTA	35	0	0	N	145	0	0	E	35	145	2011-12-06	22:00:00	2011-12-06	226Ra	=	Bq/kg ww	0.29	0.03	Ommastrephes bartramii	NOT LISTED	2290	XTW3-6	NOT LISTED	DRY ASHING ONLY	OVEN DRYING	GAMMA SEMICONDUCTOR SPETROMETRY	Body part: soft tissues (including the digestive tract, gills, heart, gonads and associated glands)Sampling method: Angle; Multiple specimens from the same sampling site were analyzed as composite samples
BIOTA	35	0	0	N	145	0	0	E	35	145	2011-12-06	22:00:00	2011-12-06	137Cs	=	Bq/kg ww	0.1	0.01	Ommastrephes bartramii	FLESH WITHOUT BONES	11310	XTW3-6	NOT LISTED	DRY ASHING ONLY	OVEN DRYING	GAMMA SEMICONDUCTOR SPETROMETRY	Sampling method: Angle; Multiple specimens from the same sampling site were analyzed as composite samples
BIOTA	35	0	0	N	145	0	0	E	35	145	2011-12-06	22:00:00	2011-12-06	134Cs	=	Bq/kg ww	0.06	0	Ommastrephes bartramii	FLESH WITHOUT BONES	11310	XTW3-6	NOT LISTED	DRY ASHING ONLY	OVEN DRYING	GAMMA SEMICONDUCTOR SPETROMETRY	Sampling method: Angle; Multiple specimens from the same sampling site were analyzed as composite samples
BIOTA	35	0	0	N	145	0	0	E	35	145	2011-12-06	22:00:00	2011-12-06	110m Ag	=	Bq/kg ww	0.07	0	Ommastrephes bartramii	FLESH WITHOUT BONES	11310	XTW3-6	NOT LISTED	DRY ASHING ONLY	OVEN DRYING	GAMMA SEMICONDUCTOR SPETROMETRY	Sampling method: Angle; Multiple specimens from the same sampling site were analyzed as composite samples
BIOTA	35	0	0	N	145	0	0	E	35	145	2011-12-06	22:00:00	2011-12-06	238U	=	Bq/kg ww	0.33	0.04	Ommastrephes bartramii	FLESH WITHOUT BONES	11310	XTW3-6	NOT LISTED	DRY ASHING ONLY	OVEN DRYING	GAMMA SEMICONDUCTOR SPETROMETRY	Sampling method: Angle; Multiple specimens from the same sampling site were analyzed as composite samples
BIOTA	35	0	0	N	145	0	0	E	35	145	2011-12-06	22:00:00	2011-12-06	40K	=	Bq/kg ww	56.29	3.75	Ommastrephes bartramii	FLESH WITHOUT BONES	11310	XTW3-6	NOT LISTED	DRY ASHING ONLY	OVEN DRYING	GAMMA SEMICONDUCTOR SPETROMETRY	Sampling method: Angle; Multiple specimens from the same sampling site were analyzed as composite samples
BIOTA	35	0	0	N	145	0	0	E	35	145	2011-12-06	22:00:00	2011-12-06	226Ra	=	Bq/kg ww	0.05	0	Ommastrephes bartramii	FLESH WITHOUT BONES	11310	XTW3-6	NOT LISTED	DRY ASHING ONLY	OVEN DRYING	GAMMA SEMICONDUCTOR SPETROMETRY	Sampling method: Angle; Multiple specimens from the same sampling site were analyzed as composite samples
BIOTA	35	0	0	N	145	0	0	E	35	145	2011-12-06	22:00:00	2011-12-06	137Cs	=	Bq/kg ww	0	0	Ommastrephes bartramii	NOT LISTED	2080	XTW3-6	NOT LISTED	DRY ASHING ONLY	OVEN DRYING	GAMMA SEMICONDUCTOR SPETROMETRY	Body part: soft tissues (including the digestive tract, gills, heart, gonads and associated glands)Sampling method: Angle; Multiple specimens from the same sampling site were analyzed as composite samples
BIOTA	35	0	0	N	145	0	0	E	35	145	2011-12-06	22:00:00	2011-12-06	134Cs	=	Bq/kg ww	0.07	0.01	Ommastrephes bartramii	NOT LISTED	2080	XTW3-6	NOT LISTED	DRY ASHING ONLY	OVEN DRYING	GAMMA SEMICONDUCTOR SPETROMETRY	Body part: soft tissues (including the digestive tract, gills, heart, gonads and associated glands)Sampling method: Angle; Multiple specimens from the same sampling site were analyzed as composite samples
BIOTA	35	0	0	N	145	0	0	E	35	145	2011-12-06	22:00:00	2011-12-06	110m Ag	=	Bq/kg ww	27.9	0.93	Ommastrephes bartramii	NOT LISTED	2080	XTW3-6	NOT LISTED	DRY ASHING ONLY	OVEN DRYING	GAMMA SEMICONDUCTOR SPETROMETRY	Body part: soft tissues (including the digestive tract, gills, heart, gonads and associated glands)Sampling method: Angle; Multiple specimens from the same sampling site were analyzed as composite samples
BIOTA	35	0	0	N	145	0	0	E	35	145	2011-12-06	22:00:00	2011-12-06	238U	=	Bq/kg ww	0	0	Ommastrephes bartramii	NOT LISTED	2080	XTW3-6	NOT LISTED	DRY ASHING ONLY	OVEN DRYING	GAMMA SEMICONDUCTOR SPETROMETRY	Body part: soft tissues (including the digestive tract, gills, heart, gonads and associated glands)Sampling method: Angle; Multiple specimens from the same sampling site were analyzed as composite samples
BIOTA	35	0	0	N	145	0	0	E	35	145	2011-12-06	22:00:00	2011-12-06	40K	=	Bq/kg ww	39.45	2.81	Ommastrephes bartramii	NOT LISTED	2080	XTW3-6	NOT LISTED	DRY ASHING ONLY	OVEN DRYING	GAMMA SEMICONDUCTOR SPETROMETRY	Body part: soft tissues (including the digestive tract, gills, heart, gonads and associated glands)Sampling method: Angle; Multiple specimens from the same sampling site were analyzed as composite samples
BIOTA	35	0	0	N	145	0	0	E	35	145	2011-12-06	22:00:00	2011-12-06	226Ra	=	Bq/kg ww	0.19	0.04	Ommastrephes bartramii	NOT LISTED	2080	XTW3-6	NOT LISTED	DRY ASHING ONLY	OVEN DRYING	GAMMA SEMICONDUCTOR SPETROMETRY	Body part: soft tissues (including the digestive tract, gills, heart, gonads and associated glands)Sampling method: Angle; Multiple specimens from the same sampling site were analyzed as composite samples
BIOTA	34	0	0	N	146	0	0	E	34	146	2011-12-14	22:30:00	2011-12-14	137Cs	=	Bq/kg ww	0.17	0.01	Ommastrephes bartramii	FLESH WITHOUT BONES	5600	XTW5-5	NOT LISTED	DRY ASHING ONLY	OVEN DRYING	GAMMA SEMICONDUCTOR SPETROMETRY	Sampling method: Angle; Multiple specimens from the same sampling site were analyzed as composite samples
BIOTA	34	0	0	N	146	0	0	E	34	146	2011-12-14	22:30:00	2011-12-14	134Cs	=	Bq/kg ww	0.15	0.01	Ommastrephes bartramii	FLESH WITHOUT BONES	5600	XTW5-5	NOT LISTED	DRY ASHING ONLY	OVEN DRYING	GAMMA SEMICONDUCTOR SPETROMETRY	Sampling method: Angle; Multiple specimens from the same sampling site were analyzed as composite samples
BIOTA	34	0	0	N	146	0	0	E	34	146	2011-12-14	22:30:00	2011-12-14	110m Ag	=	Bq/kg ww	0.16	0.01	Ommastrephes bartramii	FLESH WITHOUT BONES	5600	XTW5-5	NOT LISTED	DRY ASHING ONLY	OVEN DRYING	GAMMA SEMICONDUCTOR SPETROMETRY	Sampling method: Angle; Multiple specimens from the same sampling site were analyzed as composite samples
BIOTA	34	0	0	N	146	0	0	E	34	146	2011-12-14	22:30:00	2011-12-14	238U	=	Bq/kg ww	0.4	0.07	Ommastrephes bartramii	FLESH WITHOUT BONES	5600	XTW5-5	NOT LISTED	DRY ASHING ONLY	OVEN DRYING	GAMMA SEMICONDUCTOR SPETROMETRY	Sampling method: Angle; Multiple specimens from the same sampling site were analyzed as composite samples
BIOTA	34	0	0	N	146	0	0	E	34	146	2011-12-14	22:30:00	2011-12-14	40K	=	Bq/kg ww	94.8	6.32	Ommastrephes bartramii	FLESH WITHOUT BONES	5600	XTW5-5	NOT LISTED	DRY ASHING ONLY	OVEN DRYING	GAMMA SEMICONDUCTOR SPETROMETRY	Sampling method: Angle; Multiple specimens from the same sampling site were analyzed as composite samples
BIOTA	34	0	0	N	146	0	0	E	34	146	2011-12-14	22:30:00	2011-12-14	226Ra	=	Bq/kg ww	0	0	Ommastrephes bartramii	FLESH WITHOUT BONES	5600	XTW5-5	NOT LISTED	DRY ASHING ONLY	OVEN DRYING	GAMMA SEMICONDUCTOR SPETROMETRY	Sampling method: Angle; Multiple specimens from the same sampling site were analyzed as composite samples
BIOTA	34	0	0	N	146	0	0	E	34	146	2011-12-14	22:30:00	2011-12-14	137Cs	=	Bq/kg ww	0	0	Ommastrephes bartramii	NOT LISTED	1050	XTW5-5	NOT LISTED	DRY ASHING ONLY	OVEN DRYING	GAMMA SEMICONDUCTOR SPETROMETRY	Body part: soft tissues (including the digestive tract, gills, heart, gonads and associated glands)Sampling method: Angle; Multiple specimens from the same sampling site were analyzed as composite samples
BIOTA	34	0	0	N	146	0	0	E	34	146	2011-12-14	22:30:00	2011-12-14	134Cs	=	Bq/kg ww	0.06	0.01	Ommastrephes bartramii	NOT LISTED	1050	XTW5-5	NOT LISTED	DRY ASHING ONLY	OVEN DRYING	GAMMA SEMICONDUCTOR SPETROMETRY	Body part: soft tissues (including the digestive tract, gills, heart, gonads and associated glands)Sampling method: Angle; Multiple specimens from the same sampling site were analyzed as composite samples
BIOTA	34	0	0	N	146	0	0	E	34	146	2011-12-14	22:30:00	2011-12-14	110m Ag	=	Bq/kg ww	37.99	1.26	Ommastrephes bartramii	NOT LISTED	1050	XTW5-5	NOT LISTED	DRY ASHING ONLY	OVEN DRYING	GAMMA SEMICONDUCTOR SPETROMETRY	Body part: soft tissues (including the digestive tract, gills, heart, gonads and associated glands)Sampling method: Angle; Multiple specimens from the same sampling site were analyzed as composite samples
BIOTA	34	0	0	N	146	0	0	E	34	146	2011-12-14	22:30:00	2011-12-14	238U	=	Bq/kg ww	2.71	0.36	Ommastrephes bartramii	NOT LISTED	1050	XTW5-5	NOT LISTED	DRY ASHING ONLY	OVEN DRYING	GAMMA SEMICONDUCTOR SPETROMETRY	Body part: soft tissues (including the digestive tract, gills, heart, gonads and associated glands)Sampling method: Angle; Multiple specimens from the same sampling site were analyzed as composite samples
BIOTA	34	0	0	N	146	0	0	E	34	146	2011-12-14	22:30:00	2011-12-14	40K	=	Bq/kg ww	52.26	3.62	Ommastrephes bartramii	NOT LISTED	1050	XTW5-5	NOT LISTED	DRY ASHING ONLY	OVEN DRYING	GAMMA SEMICONDUCTOR SPETROMETRY	Body part: soft tissues (including the digestive tract, gills, heart, gonads and associated glands)Sampling method: Angle; Multiple specimens from the same sampling site were analyzed as composite samples
BIOTA	34	0	0	N	146	0	0	E	34	146	2011-12-14	22:30:00	2011-12-14	226Ra	=	Bq/kg ww	0	0	Ommastrephes bartramii	NOT LISTED	1050	XTW5-5	NOT LISTED	DRY ASHING ONLY	OVEN DRYING	GAMMA SEMICONDUCTOR SPETROMETRY	Body part: soft tissues (including the digestive tract, gills, heart, gonads and associated glands)Sampling method: Angle; Multiple specimens from the same sampling site were analyzed as composite samples
BIOTA	34	0	0	N	146	0	0	E	34	146	2011-12-14	22:30:00	2011-12-14	137Cs	=	Bq/kg ww	0.12	0.01	Ommastrephes bartramii	FLESH WITHOUT BONES	6540	XTW5-5	NOT LISTED	DRY ASHING ONLY	OVEN DRYING	GAMMA SEMICONDUCTOR SPETROMETRY	Sampling method: Angle; Multiple specimens from the same sampling site were analyzed as composite samples
BIOTA	34	0	0	N	146	0	0	E	34	146	2011-12-14	22:30:00	2011-12-14	134Cs	=	Bq/kg ww	0.07	0	Ommastrephes bartramii	FLESH WITHOUT BONES	6540	XTW5-5	NOT LISTED	DRY ASHING ONLY	OVEN DRYING	GAMMA SEMICONDUCTOR SPETROMETRY	Sampling method: Angle; Multiple specimens from the same sampling site were analyzed as composite samples
BIOTA	34	0	0	N	146	0	0	E	34	146	2011-12-14	22:30:00	2011-12-14	110m Ag	=	Bq/kg ww	0.06	0	Ommastrephes bartramii	FLESH WITHOUT BONES	6540	XTW5-5	NOT LISTED	DRY ASHING ONLY	OVEN DRYING	GAMMA SEMICONDUCTOR SPETROMETRY	Sampling method: Angle; Multiple specimens from the same sampling site were analyzed as composite samples
BIOTA	34	0	0	N	146	0	0	E	34	146	2011-12-14	22:30:00	2011-12-14	238U	=	Bq/kg ww	0.21	0.05	Ommastrephes bartramii	FLESH WITHOUT BONES	6540	XTW5-5	NOT LISTED	DRY ASHING ONLY	OVEN DRYING	GAMMA SEMICONDUCTOR SPETROMETRY	Sampling method: Angle; Multiple specimens from the same sampling site were analyzed as composite samples
BIOTA	34	0	0	N	146	0	0	E	34	146	2011-12-14	22:30:00	2011-12-14	40K	=	Bq/kg ww	74.44	4.97	Ommastrephes bartramii	FLESH WITHOUT BONES	6540	XTW5-5	NOT LISTED	DRY ASHING ONLY	OVEN DRYING	GAMMA SEMICONDUCTOR SPETROMETRY	Sampling method: Angle; Multiple specimens from the same sampling site were analyzed as composite samples
BIOTA	34	0	0	N	146	0	0	E	34	146	2011-12-14	22:30:00	2011-12-14	226Ra	=	Bq/kg ww	0	0	Ommastrephes bartramii	FLESH WITHOUT BONES	6540	XTW5-5	NOT LISTED	DRY ASHING ONLY	OVEN DRYING	GAMMA SEMICONDUCTOR SPETROMETRY	Sampling method: Angle; Multiple specimens from the same sampling site were analyzed as composite samples
BIOTA	34	0	0	N	146	0	0	E	34	146	2011-12-14	22:30:00	2011-12-14	137Cs	=	Bq/kg ww	0	0	Ommastrephes bartramii	NOT LISTED	1390	XTW5-5	NOT LISTED	DRY ASHING ONLY	OVEN DRYING	GAMMA SEMICONDUCTOR SPETROMETRY	Body part: soft tissues (including the digestive tract, gills, heart, gonads and associated glands)Sampling method: Angle; Multiple specimens from the same sampling site were analyzed as composite samples
BIOTA	34	0	0	N	146	0	0	E	34	146	2011-12-14	22:30:00	2011-12-14	134Cs	=	Bq/kg ww	0.1	0.01	Ommastrephes bartramii	NOT LISTED	1390	XTW5-5	NOT LISTED	DRY ASHING ONLY	OVEN DRYING	GAMMA SEMICONDUCTOR SPETROMETRY	Body part: soft tissues (including the digestive tract, gills, heart, gonads and associated glands)Sampling method: Angle; Multiple specimens from the same sampling site were analyzed as composite samples
BIOTA	34	0	0	N	146	0	0	E	34	146	2011-12-14	22:30:00	2011-12-14	110m Ag	=	Bq/kg ww	45.85	1.51	Ommastrephes bartramii	NOT LISTED	1390	XTW5-5	NOT LISTED	DRY ASHING ONLY	OVEN DRYING	GAMMA SEMICONDUCTOR SPETROMETRY	Body part: soft tissues (including the digestive tract, gills, heart, gonads and associated glands)Sampling method: Angle; Multiple specimens from the same sampling site were analyzed as composite samples
BIOTA	34	0	0	N	146	0	0	E	34	146	2011-12-14	22:30:00	2011-12-14	238U	=	Bq/kg ww	2.88	0.38	Ommastrephes bartramii	NOT LISTED	1390	XTW5-5	NOT LISTED	DRY ASHING ONLY	OVEN DRYING	GAMMA SEMICONDUCTOR SPETROMETRY	Body part: soft tissues (including the digestive tract, gills, heart, gonads and associated glands)Sampling method: Angle; Multiple specimens from the same sampling site were analyzed as composite samples
BIOTA	34	0	0	N	146	0	0	E	34	146	2011-12-14	22:30:00	2011-12-14	40K	=	Bq/kg ww	64.39	4.42	Ommastrephes bartramii	NOT LISTED	1390	XTW5-5	NOT LISTED	DRY ASHING ONLY	OVEN DRYING	GAMMA SEMICONDUCTOR SPETROMETRY	Body part: soft tissues (including the digestive tract, gills, heart, gonads and associated glands)Sampling method: Angle; Multiple specimens from the same sampling site were analyzed as composite samples
BIOTA	34	0	0	N	146	0	0	E	34	146	2011-12-14	22:30:00	2011-12-14	226Ra	=	Bq/kg ww	0	0	Ommastrephes bartramii	NOT LISTED	1390	XTW5-5	NOT LISTED	DRY ASHING ONLY	OVEN DRYING	GAMMA SEMICONDUCTOR SPETROMETRY	Body part: soft tissues (including the digestive tract, gills, heart, gonads and associated glands)Sampling method: Angle; Multiple specimens from the same sampling site were analyzed as composite samples

## Sheet: List - Body part
Body part list for biota data
Select (copy and paste) a body part from the list below to include in the data reporting sheets to describe the biota sample.
If a good match is not available, use NOT LISTED and note your own description in the 'Sample notes' field. In case of queries, contact Paul McGinnity, CRP K41017 Technical Officer (p.mc-ginnity@iaea.org) or the MARiS contact point (MARIS.Contact-Point@iaea.org, p.morris@iaea.org).
Body part	Comment
NOT KNOWN
NOT LISTED
WHOLE ANIMAL
WHOLE ANIMAL EVISCERATED
WHOLE ANIMAL EVISCERATED WITHOUT HEAD
FLESH WITH BONES	e.g. fish fillets with bones
FLESH WITHOUT BONES	e.g. fish fillets without bones
EXOSKELETON
ENDOSKELETON
SHELLS
MOLT
SKIN
SCALES
SOFT PARTS	Any nonbony and noncartilaginous tissues
BLOOD
HEAD
FINS
VISCERA	Internal organs of the body cavity
STOMACH
STOMACH + INTESTINE
HEPATOPANCREAS
PYLORIC CAECA
LIVER
INTESTINE
KIDNEY
HEART
BRANCHIAL HEART
GILLS
GONAD
OVARY
TESTES
FAECAL PELLET
WHOLE PLANT
UPPER PARTS OF PLANTS
LOWER PARTS OF PLANTS
ROOT/RHIZOME

## Sheet: Lists - Methods
Lists for: sampling, preparation, drying and counting methods
Select (copy and paste) methods to include in the data reporting sheets to provide metadata on the sampling, preparation, drying and counting methods used.
If a good match is not available, use NOT LISTED and note your own description in either the 'Sample notes' or 'Measurement notes' fields. In case of queries, contact Paul McGinnity, CRP K41017 Technical Officer (p.mc-ginnity@iaea.org) or the MARiS contact point (MARIS.Contact-Point@iaea.org, p.morris@iaea.org).
Sampling method	Comment		Preparation method	Comment		Counting method		Drying method
NOT KNOWN			NOT KNOWN			NOT KNOWN		NOT KNOWN
NOT LISTED			NOT LISTED			NOT LISTED		NOT LISTED
BOTTLE SAMPLING WATER	Water		DISTILLATION	--> source (e.g., H-3)		ATOMIC ABSORPTION		AIR DRYING
GRAB SAMPLING WATER			ELECTROLYTIC ENRICHMENT	(H-3)		ALPHA		FREEZE DRYING
PUMPING WATER			EVAPORATION ONLY	--> source (e.g., sea salts)		ALPHA IONIZATION CHAMBER SPECTROMETRY		OVEN DRYING
PUMPING WITH PRE-CONCENTRATION WATER			EVAPORATION WITH CHEMISTRY	--> chemical separations --> source (e.g., small volume analyses for Sr-90, Cs-137, Pu and Am)		ALPHA LIQUID SCINTILLATION SPECTROMETRY		SILICA GEL DRYING
BOX CORER	Sediment		PRECIPITATION	--> chemical separations --> source (e.g., large volume seawater analyses for Sr-90, Cs-137, Pu and Am)		ALPHA LUCAS TYPE SCINTILLATION
GRAB SAMPLER SEDIMENT			DRYING ONLY	--> source (e.g., non-destructive gamma spectrometry)		ALPHA SEMICONDUCTOR SPECTROMETRY
GRAVITY CORER			DRY ASHING ONLY	--> source (e.g., gamma spectrometry)		ALPHA TOTAL
GRAVITY CORER WITH PISTON			DRY ASHING WITH CHEMISTRY	--> dissolution --> chemical separations --> source (e.g., Pu, Sr-90)		BETA
OTHER TYPE OF SAMPLER - SPECIFY			WET ASHING/DISSOLUTION	--> chemical separations --> source (e.g., Po-210 analyses)		BETA GM COUNTING
BOTTLE SAMPLING PARTICLES	Suspended & sedimenting particles		COMBUSTION GAS COLLECTION	--> CO2 collection --> source (for C-14 or carbon isotope ratios)		BETA LIQUID SCINTILLATION SPECTROMETRY
PUMPING PARTICLES			UNPROCESSED WATER	--> source (e.g., Marinelli container for direct analysis of I-131)		BETA GAS PROPORTIONAL COUNTING
PUMPING WITH PRE-CONCENTRATION PARTICLES			COLUMN SEPARATION	--> source (e.g., small-medium volume analysis for Cs-134 & Cs-137)		BETA SEMICONDUCTOR SPECTROMETRY
SEDIMENT TRAP			PARTIAL DRYING	--> source (e.g., alpha scintilation for Ra-223, Ra-224, 227-Ac, Th-228)		BETA TOTAL
NET	Biota					GAMMA
DREDGE						GAMMA SPECTROMETRY IN SITU
BY HAND						GAMMA SEMICONDUCTOR SPECTROMETRY
SCOOP						GAMMA SCINTILLATION SPECTROMETRY
						INDUCTIVELY COUPLED PLASMA AES
						INDUCTIVELY COUPLED PLASMA SOURCE MASS SPECTROMETRY
						MASS SPECTROMETRY
						RESONANCE IONIZATION MASS SPECTROMETRY
						THERMAL IONIZATION MASS SPECTROMETRY
						ACCELERATOR MASS SPECTROMETRY
						FISSION TRACK COUNTING
						NEUTRON ACTIVATION ANALYSIS
						COLORIMETRY
						FLUORIMETRY
						X-RAY SPECTROMETRY
