# Supplementary material for: Artificial radionuclides in neon flying squid from the northwestern Pacific in 2011 following the Fukushima accident
Source: Copernicus journal article supplement (doi:10.5194/bg-15-7235-2018), 2018-12-05
Supplement: Supplementary file 2 [file bg-15-7235-2018-supplement.zip]

Archive with 3 entries (3 files):
- Supplement.pdf
- bg-15-7235-2018-supplement-title-page.pdf
- Dataset.xlsx
