# Supplementary material for: Artificial radionuclides in neon flying squid from the northwestern Pacific in 2011 following the Fukushima accident
Source: Copernicus journal article supplement (doi:10.5194/bg-15-7235-2018), 2018-12-05
Supplement: Supplementary file 2 [file bg-15-7235-2018-supplement.zip › Supplement.pdf]

Table S1. Key Dose Conversion Coefficients for a typical 1.3 kg neon flying squid as generated within the ERICA-Tool for an ellipsoid equivalent of 0.3 m, 0.1 m, and 0.085 m for length, width, and height respectively.

|         | External beta-gamma | Internal alpha | Internal beta-gamma |
|---------|---------------------|----------------|---------------------|
| Ag-110m | 1.37E-03            |                | 2.67E-04            |
| Cs-134  | 7.69E-04            |                | 2.22E-04            |
| Cs-137  | 2.79E-04            |                | 1.90E-04            |
| U-238   | 9.41E-08            | 2.41E-03       | 5.80E-06            |
| Ra-226  | 8.98E-04            | 1.38E-02       | 6.71E-04            |
| Po-210  | 4.21E-09            | 3.10E-03       | 7.37E-10            |

Table S2. Dose Conversion Factors for ingestion by members of public from ICRP Pub 119.

|          | Ag-110m | Cs-134  | Cs-137  | U-238   | Ra-226  | Po-210  |
|----------|---------|---------|---------|---------|---------|---------|
| ICRP DCF | 2.8E-09 | 1.9E-08 | 1.3E-08 | 4.5E-08 | 2.8E-07 | 1.2E-06 |
